# Supplementary material
Source: publisher figshare collection journal article supplement (https://springernature.figshare.com/ndownloader/files/14328749)

**BMF cell phenotypes  
in the presence and in the absence of osteopontin**

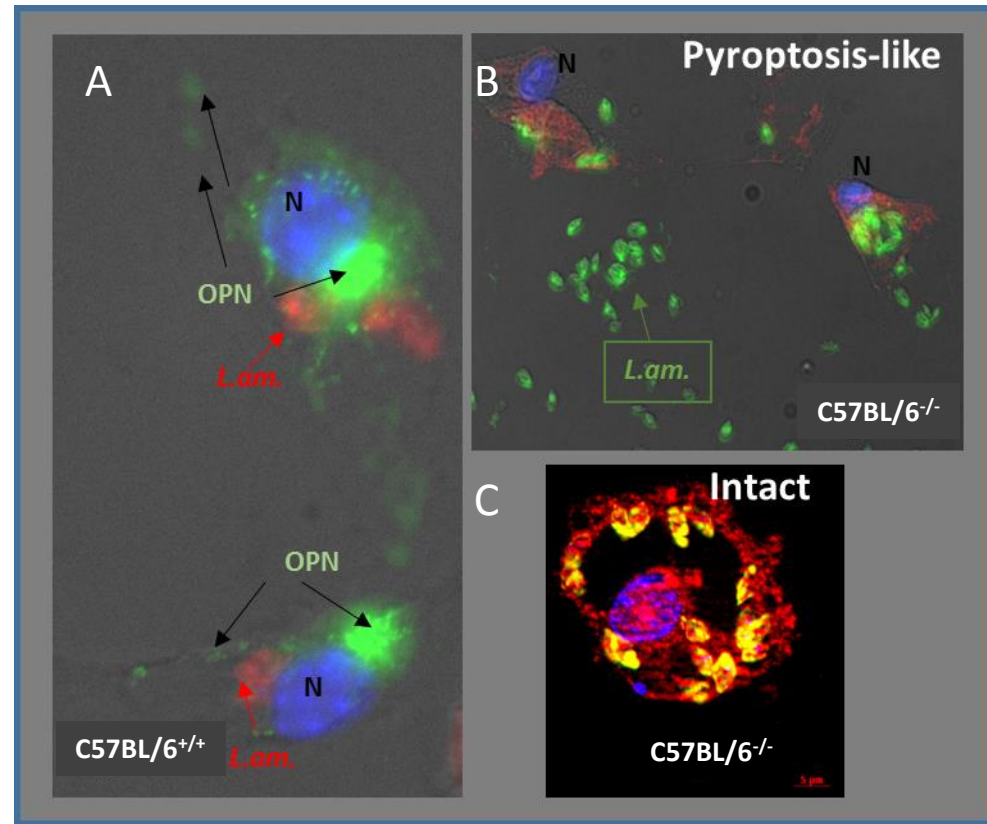

Supplement: Supplementary file [file 14328749]
